# Supplementary material for: Myricanol rescues dexamethasone‐induced muscle dysfunction via a sirtuin 1‐dependent mechanism
Source: PubMed Central journal article supplement — J Cachexia Sarcopenia Muscle. 2019 Feb 21;10(2):429–44. doi: 10.1002/jcsm.12393 (PMC6463464; doi:10.1002/jcsm.12393), 2019-02-21

# Uncropped blots for Figure 1C

MY (10  $\mu$ M) - + - +  
DEX - - + +

MyHC

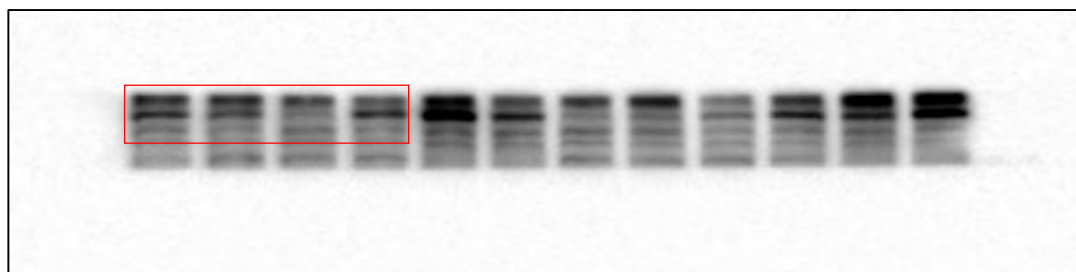

atrogen-1

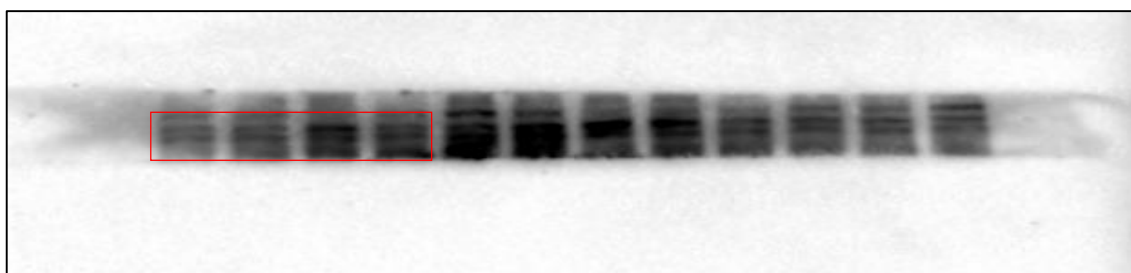

MuRF1

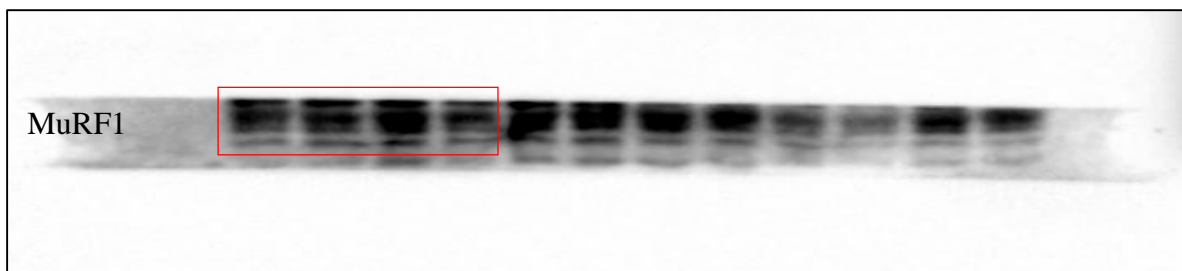

GAPDH

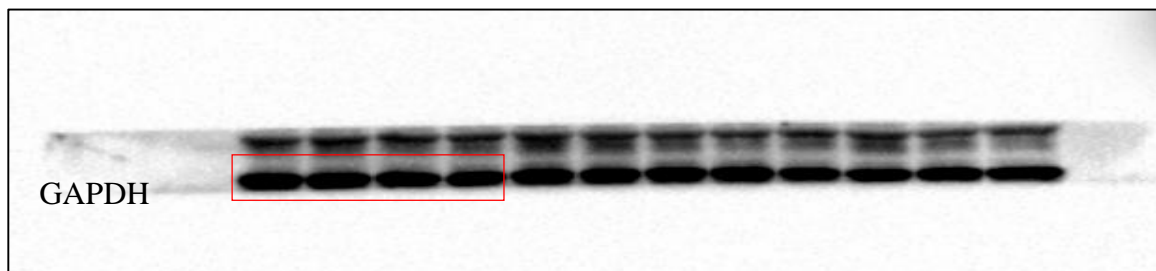

Uncropped blots for Figure 2A

MY ( $\mu$ M) 0 10 0 2.5 5 10  
DEX - - + + + +

SIRT1

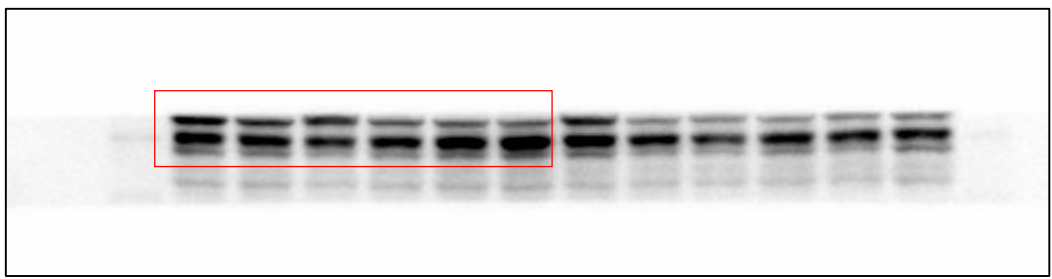

GAPDH

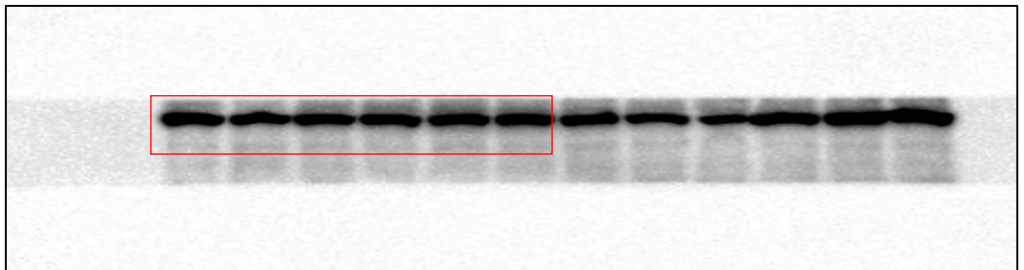

Uncropped blots for Figure 2D

|                     |   |   |   |   |   |
|---------------------|---|---|---|---|---|
| MY (10 $\mu$ M)     | - | - | + | - | + |
| EX-527 (20 $\mu$ M) | - | - | - | + | + |
| DEX                 | - | + | + | + | + |

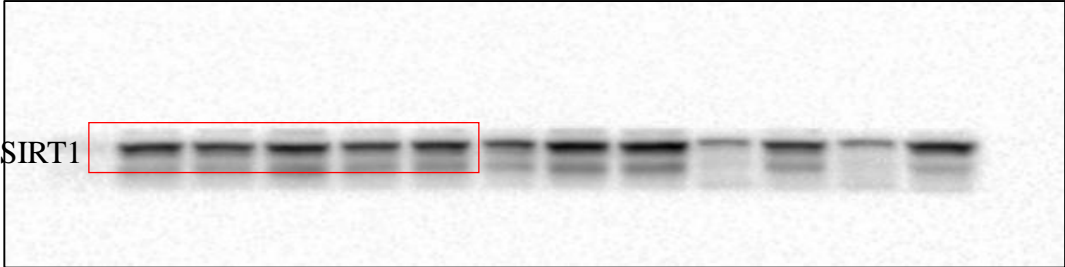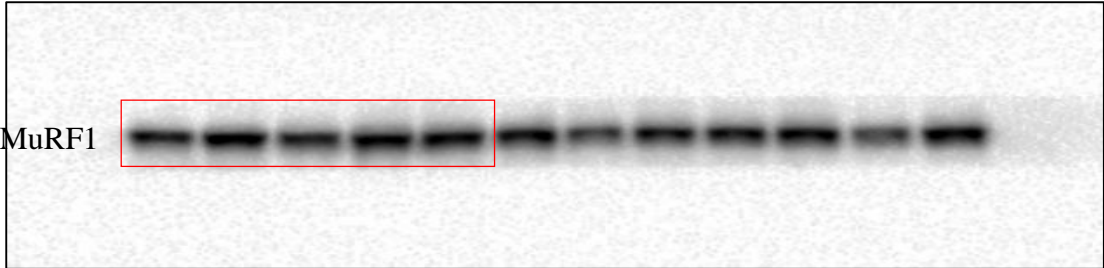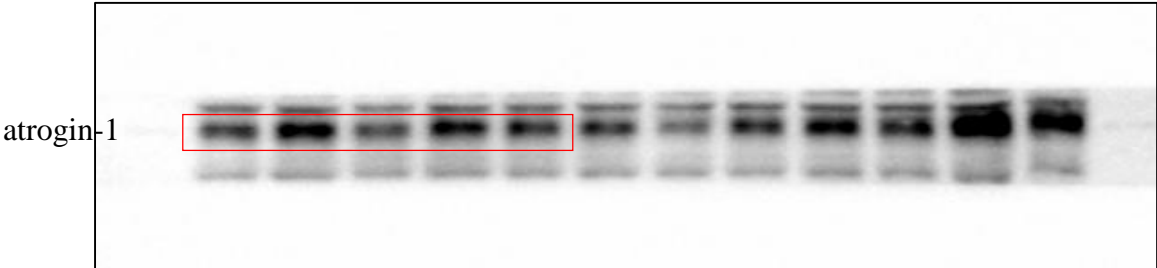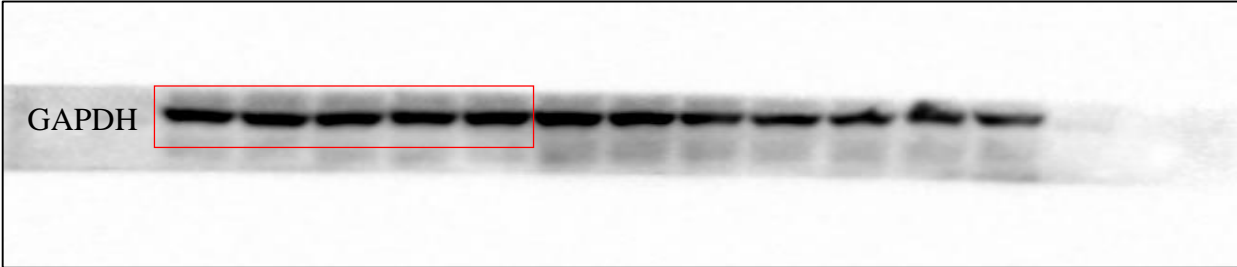

Uncropped blots for Figure 2E

|               |   |    |   |     |   |    |
|---------------|---|----|---|-----|---|----|
| MY ( $\mu$ M) | 0 | 10 | 0 | 2.5 | 5 | 10 |
| DEX           | - | -  | + | +   | + | +  |

p-Akt

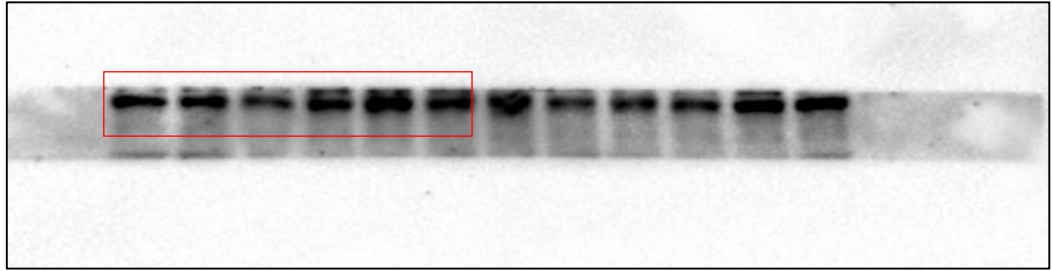

Akt

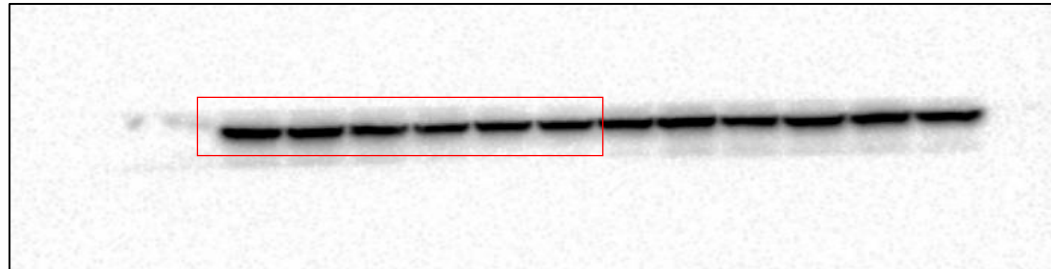

p-FoxO3a

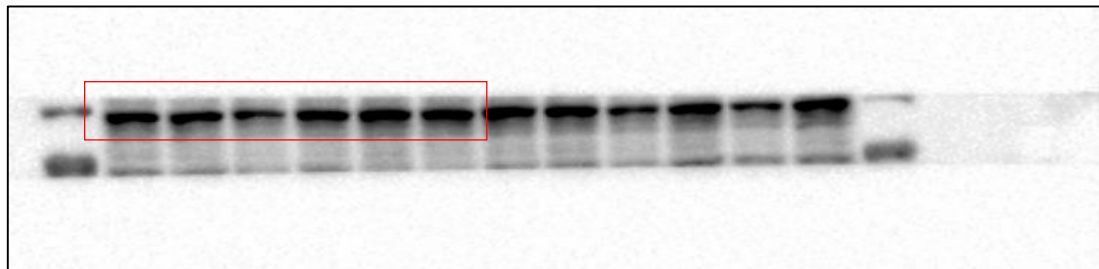

FoxO3a

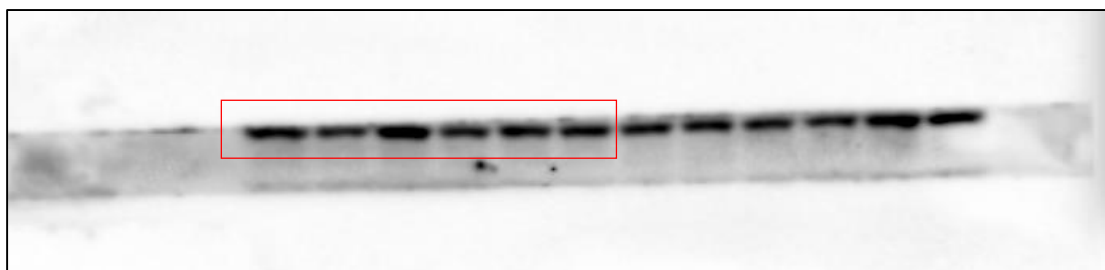

Uncropped blots for Figure 3C

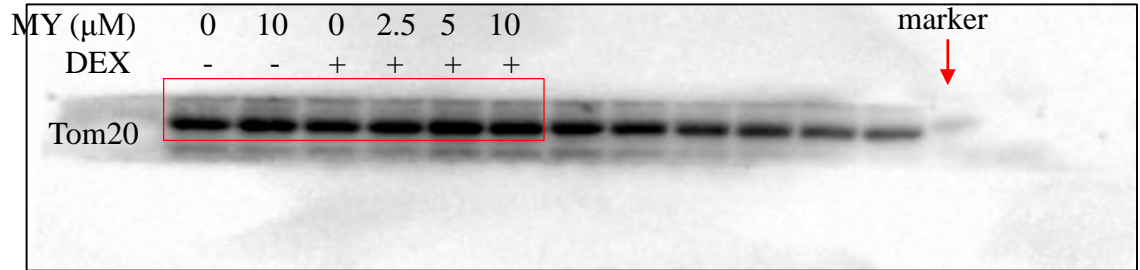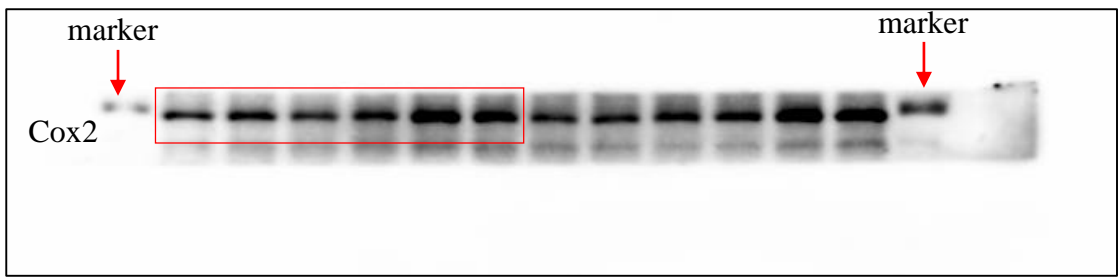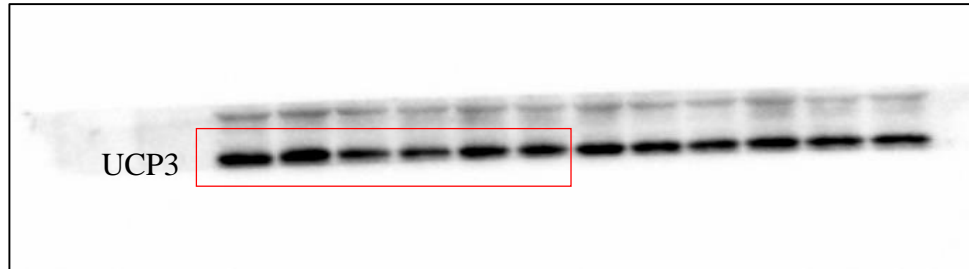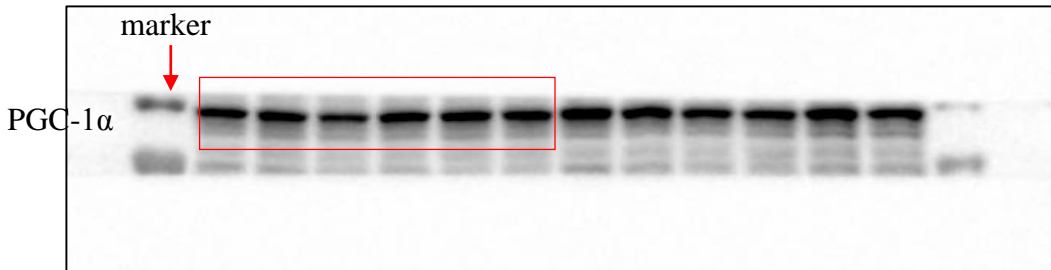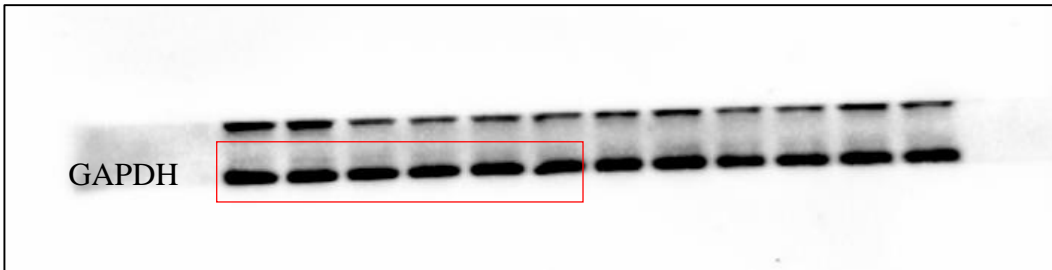

**Uncropped blots for Figure 3D**

|                     |   |   |   |   |   |
|---------------------|---|---|---|---|---|
| MY (10 $\mu$ M)     | - | - | + | - | + |
| EX-527 (20 $\mu$ M) | - | - | - | + | + |
| DEX                 | - | + | + | + | + |

IP: PGC-1 $\alpha$   
WB: Ac-lysine

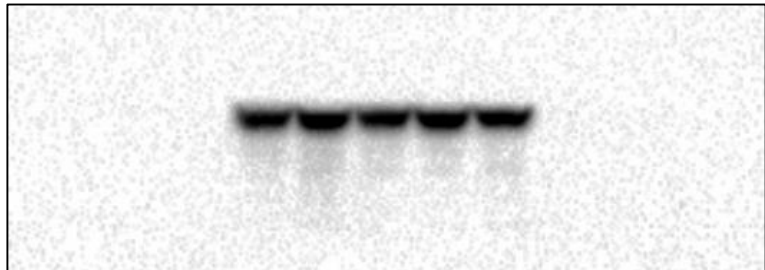

IP: WB: PGC-1 $\alpha$

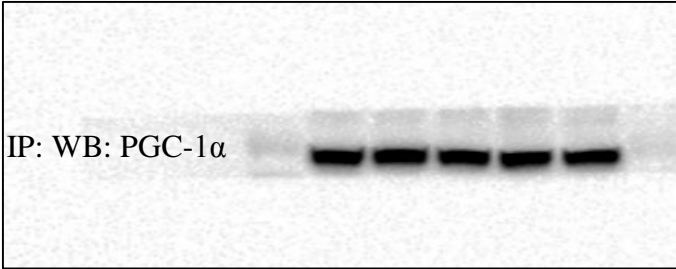

PGC-1 $\alpha$

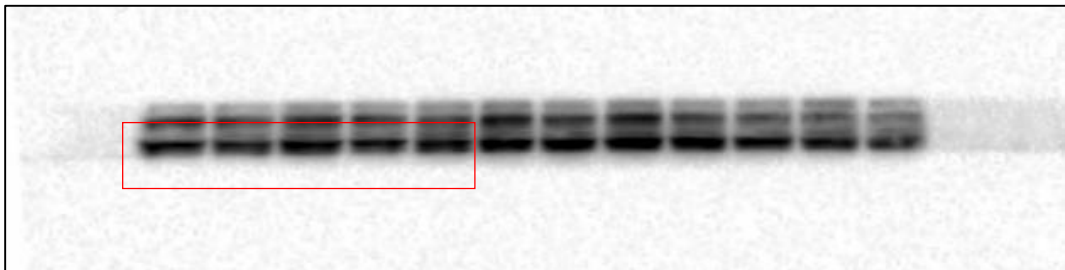

GAPDH

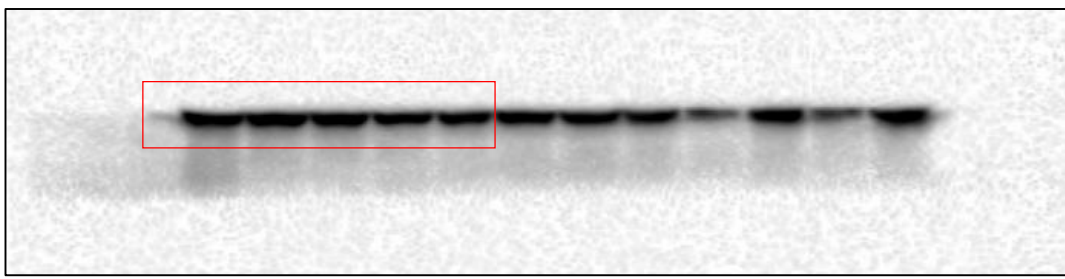

# Uncropped blots for Figure 3E

|                     |   |   |   |   |   |
|---------------------|---|---|---|---|---|
| MY (10 $\mu$ M)     | - | - | + | - | + |
| EX-527 (20 $\mu$ M) | - | - | - | + | + |
| DEX                 | - | + | + | + | + |

IP: FoxO3a  
WB: Ac-lysine

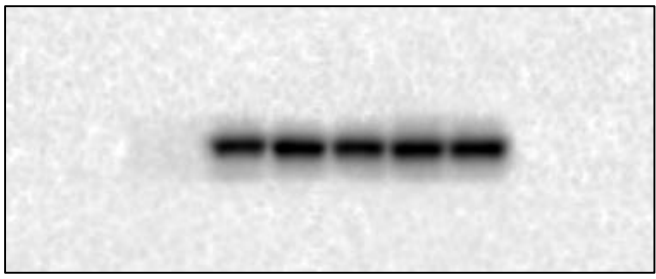

WB: IP: FoxO3a

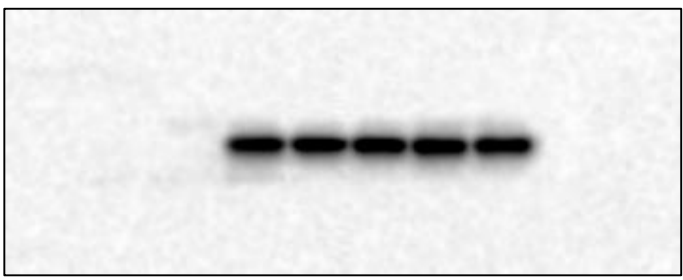

FoxO3a

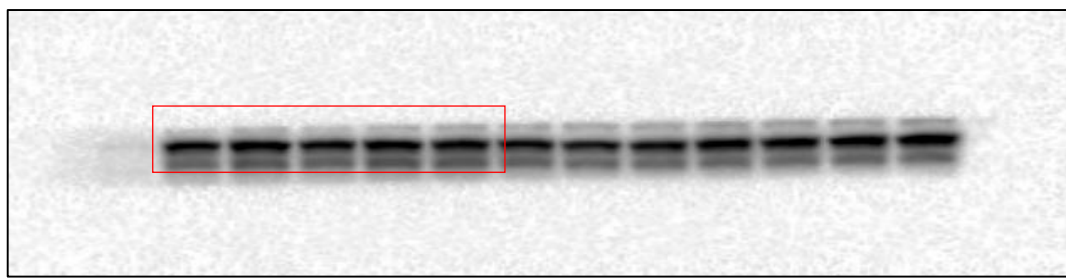

GAPDH

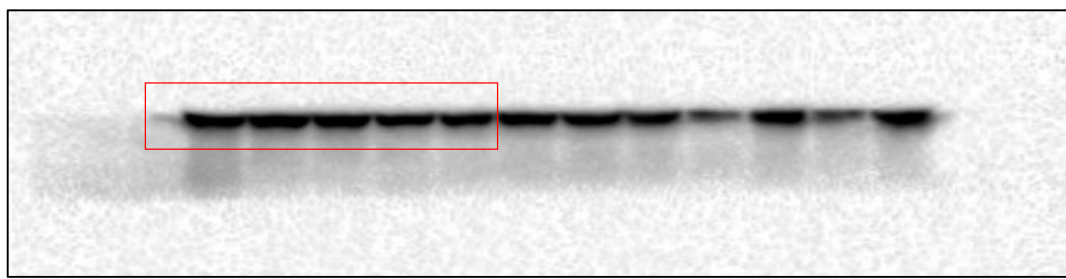

**Uncropped blots for Figure 4A**

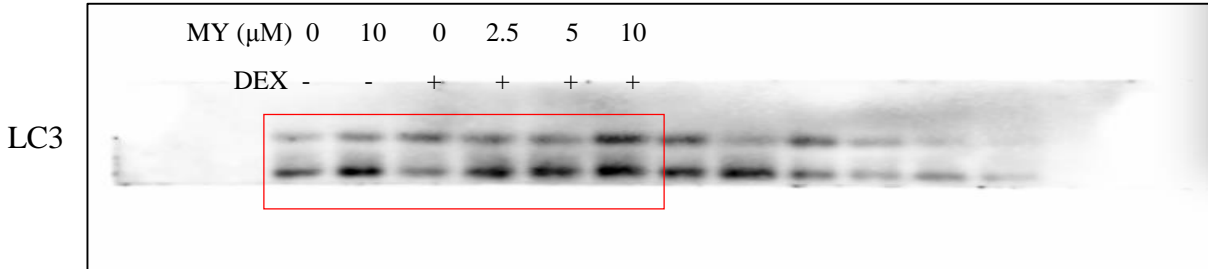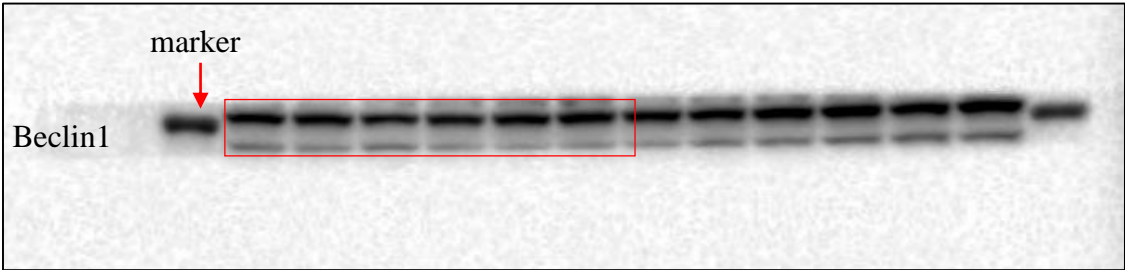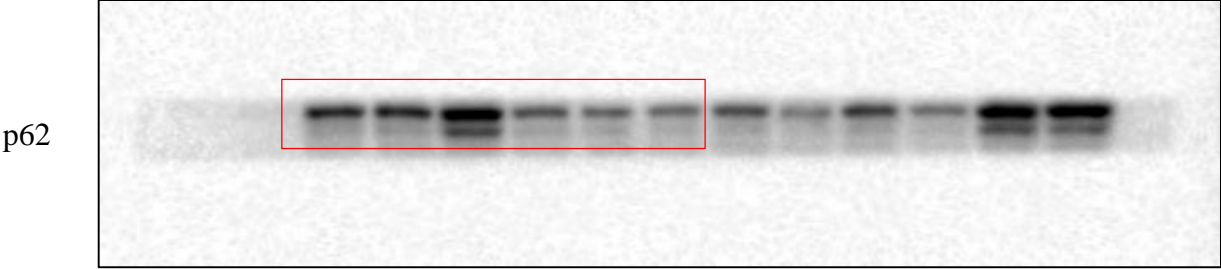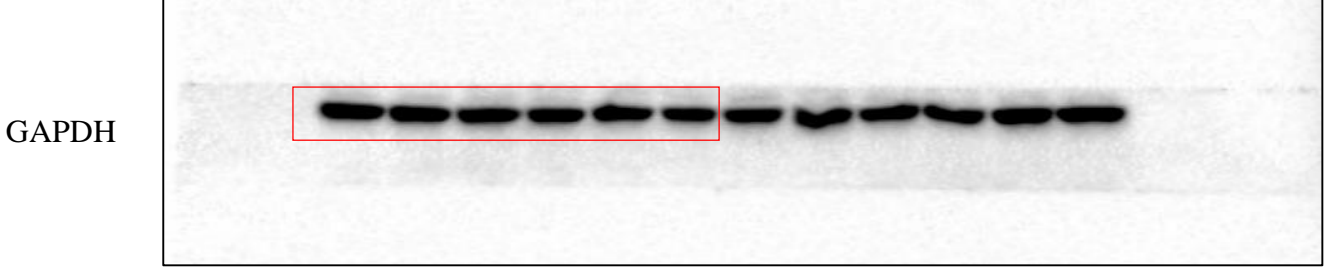



# Uncropped blots for Figure 4C

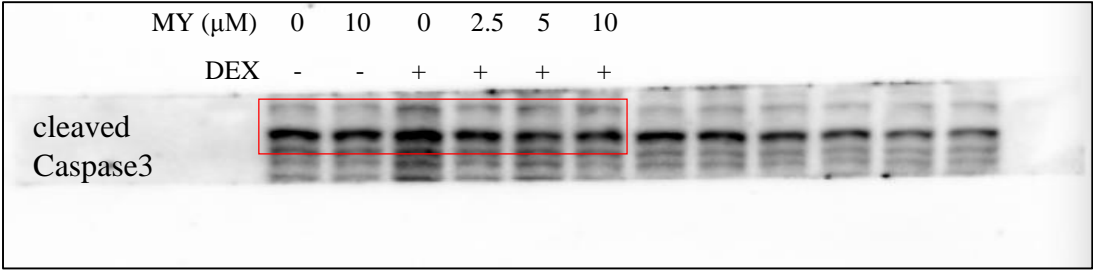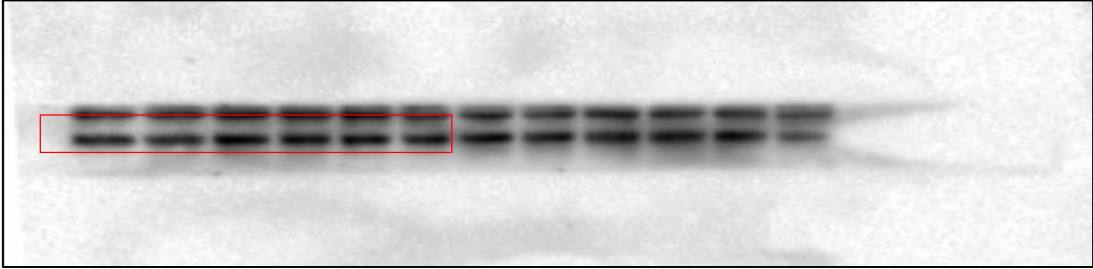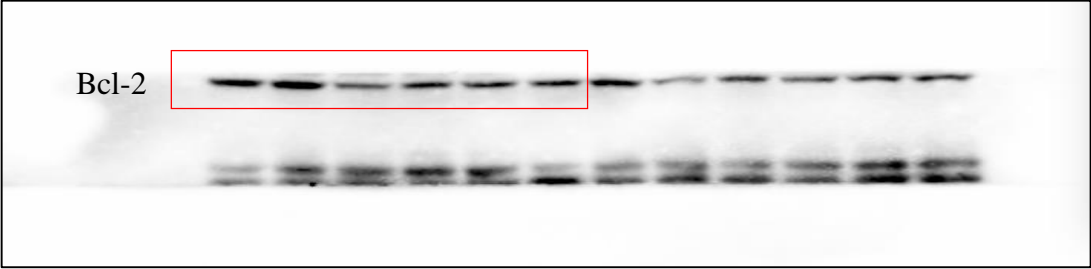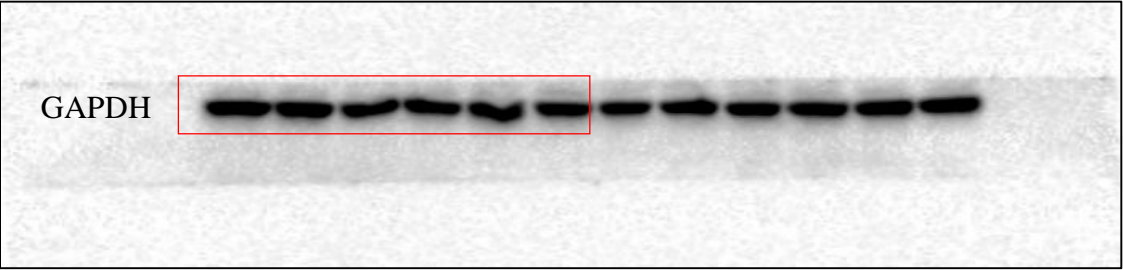

**Uncropped blots for Figure 4D**

|                     |   |   |   |   |   |
|---------------------|---|---|---|---|---|
| MY (10 $\mu$ M)     | - | - | + | - | + |
| EX-527 (20 $\mu$ M) | - | - | - | + | + |
| DEX                 | - | + | + | + | + |

cleaved  
Caspase3

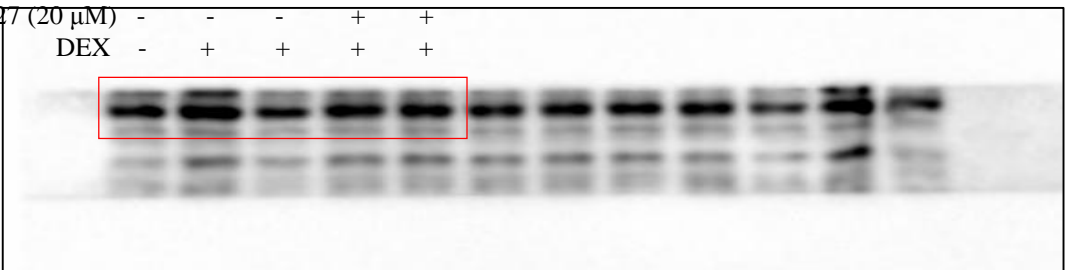

Bax

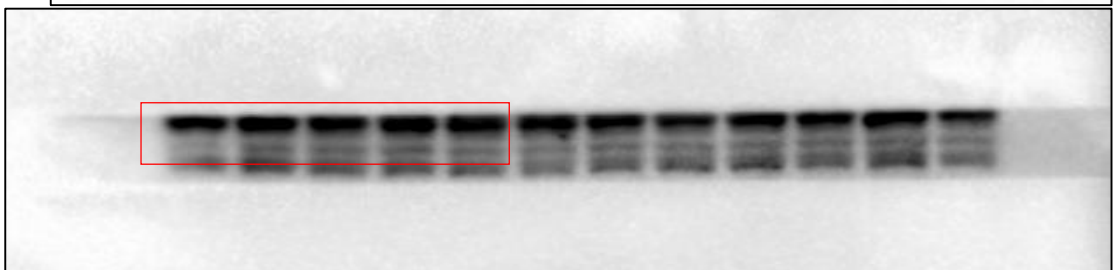

Bcl-2

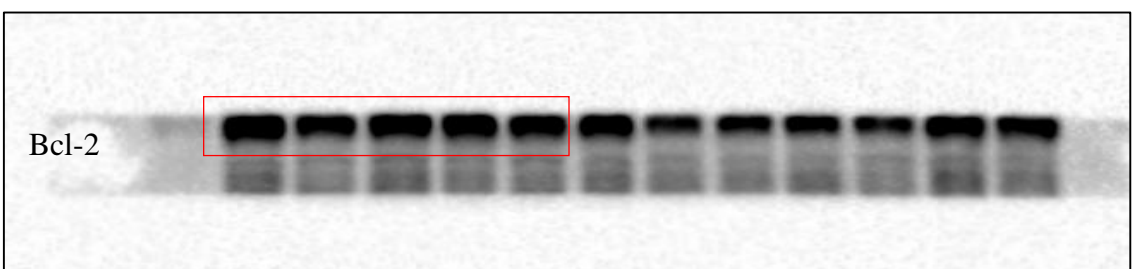

GAPDH

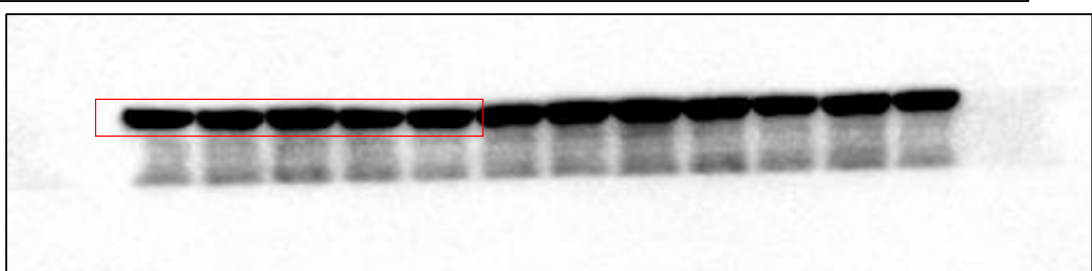

# Uncropped blots for Figure 6A

|            |   |    |   |   |    |   |    |
|------------|---|----|---|---|----|---|----|
| MY (mg/kg) | - | 50 | - | 5 | 50 | - | 50 |
| DEX        | - | -  | + | + | +  | + | +  |
| EX-527     | - | -  | - | - | -  | + | +  |

SIRT1

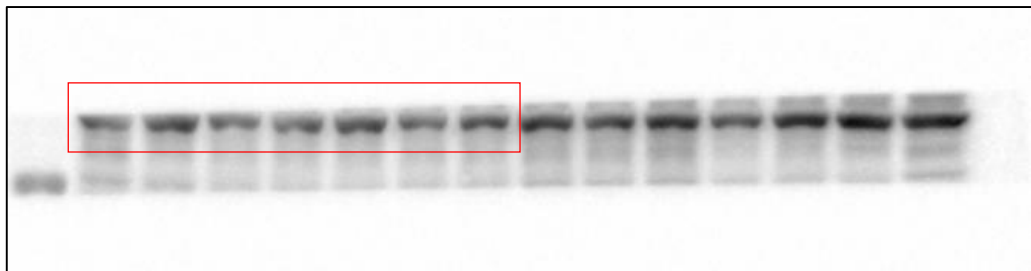

atrogen-1

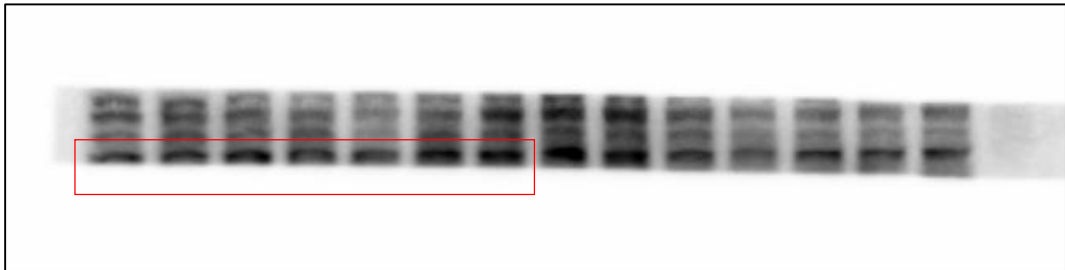

MuRF1

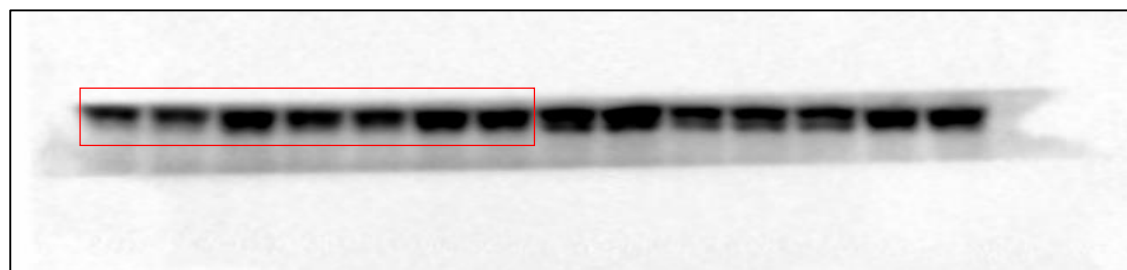

# Uncropped blots for Figure 6A

|            |   |    |   |   |    |   |    |
|------------|---|----|---|---|----|---|----|
| MY (mg/kg) | - | 50 | - | 5 | 50 | - | 50 |
| DEX        | - | -  | + | + | +  | + | +  |
| EX-527     | - | -  | - | - | -  | + | +  |

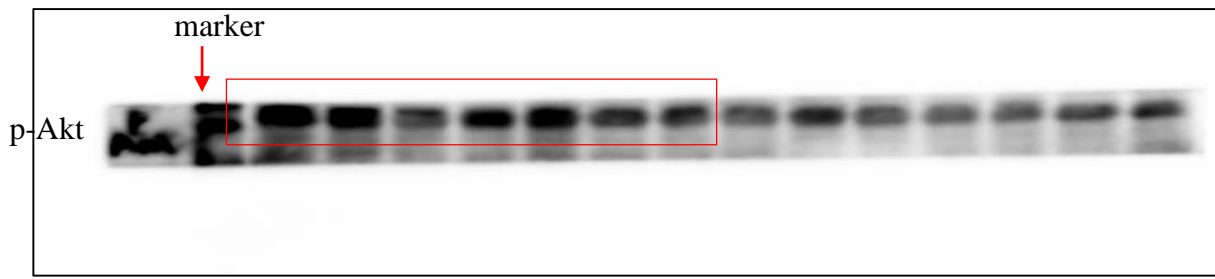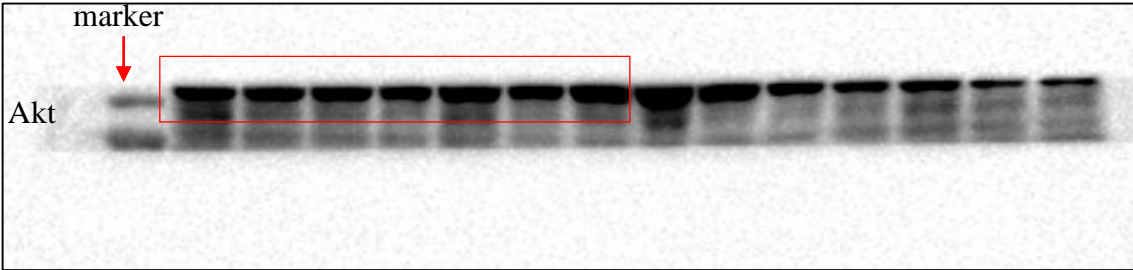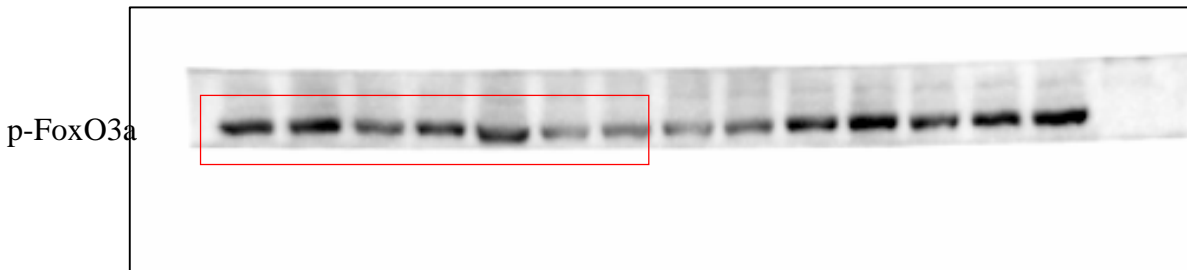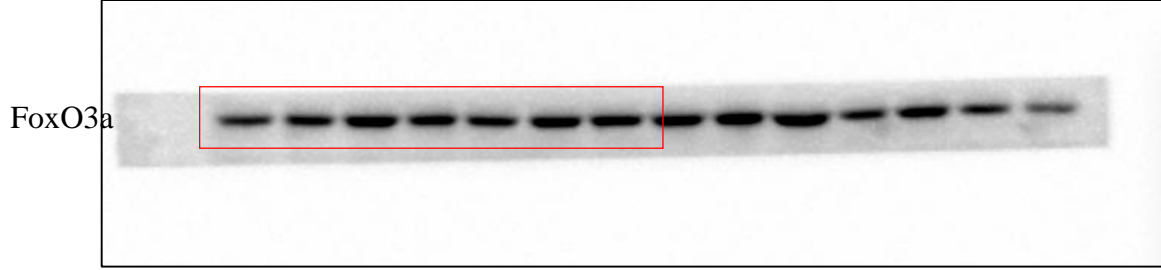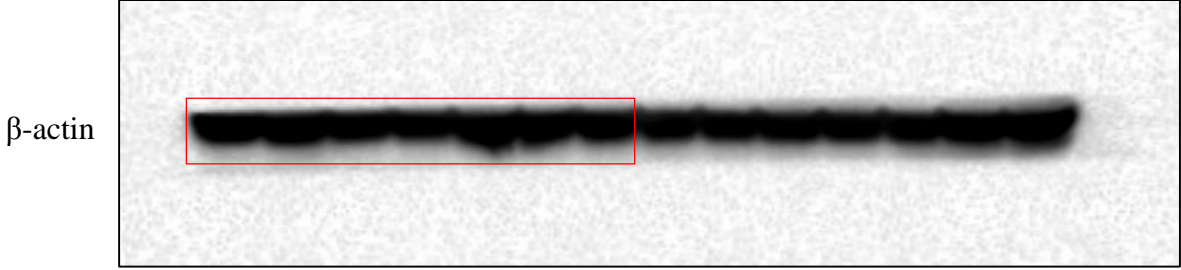

# Uncropped blots for Figure 6B

|            |   |    |   |   |    |   |    |
|------------|---|----|---|---|----|---|----|
| MY (mg/kg) | - | 50 | - | 5 | 50 | - | 50 |
| DEX        | - | -  | + | + | +  | + | +  |
| EX-527     | - | -  | - | - | -  | + | +  |

LC3

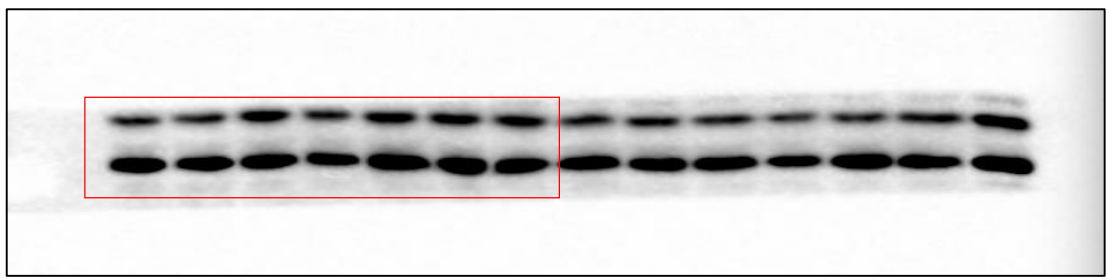

Beclin1

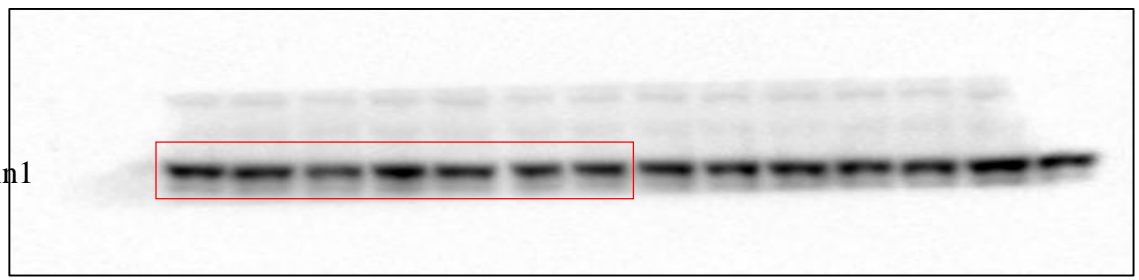

p62

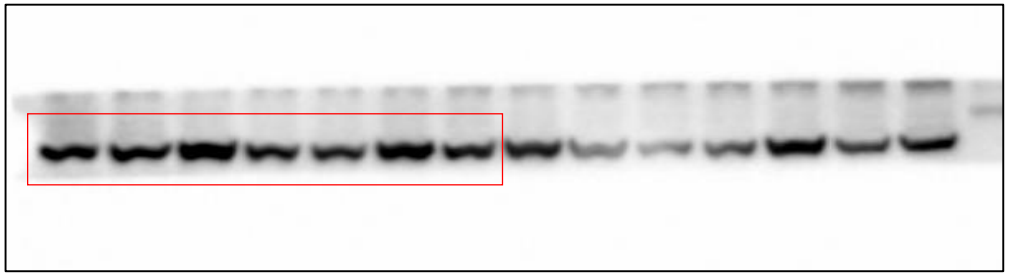

# Uncropped blots for Figure 6B

|            |   |    |   |   |    |   |    |
|------------|---|----|---|---|----|---|----|
| MY (mg/kg) | - | 50 | - | 5 | 50 | - | 50 |
| DEX        | - | -  | + | + | +  | + | +  |
| EX-527     | - | -  | - | - | -  | + | +  |

cleaved  
Caspase3

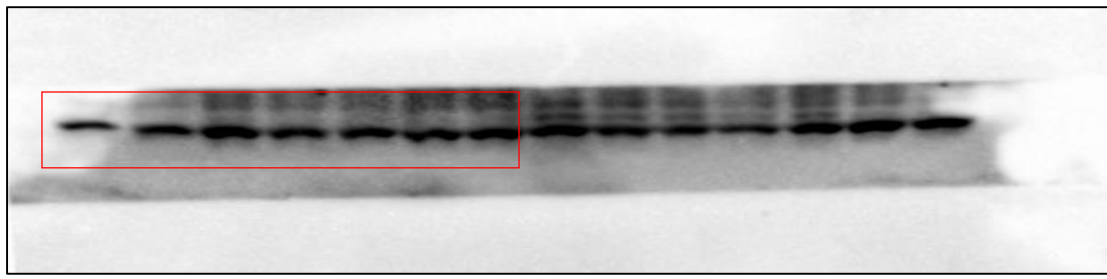

Bax

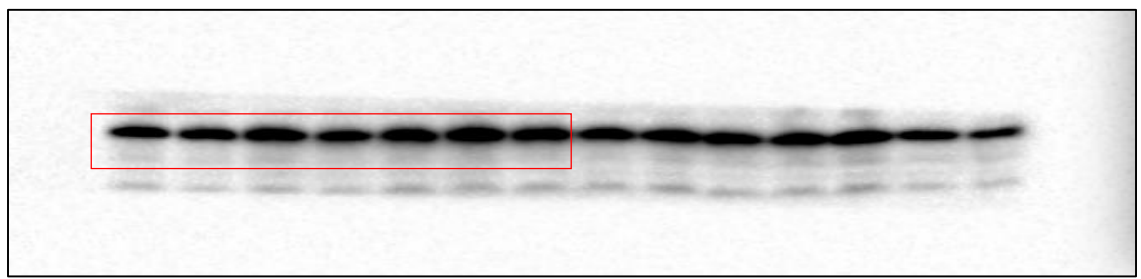

Bcl-2

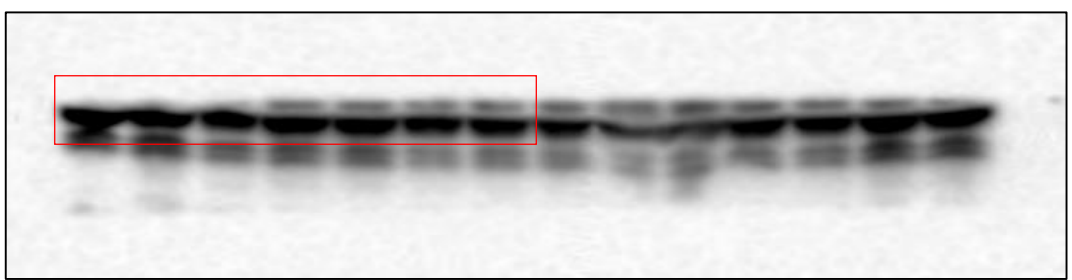

$\beta$ -actin

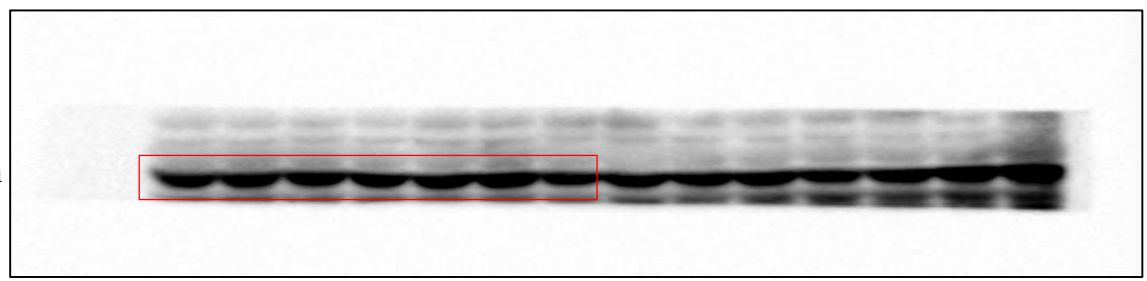

# Uncropped blots for Figure 6C

|            |   |    |   |   |    |   |    |
|------------|---|----|---|---|----|---|----|
| MY (mg/kg) | - | 50 | - | 5 | 50 | - | 50 |
| DEX        | - | -  | + | + | +  | + | +  |
| EX-527     | - | -  | - | - | -  | + | +  |

PGC-1 $\alpha$

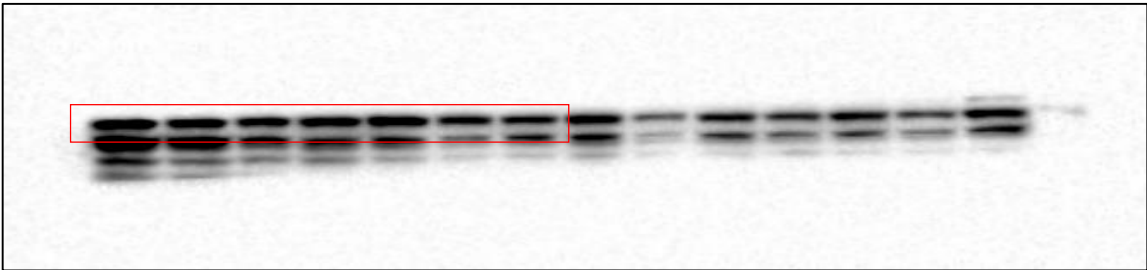

Tom20

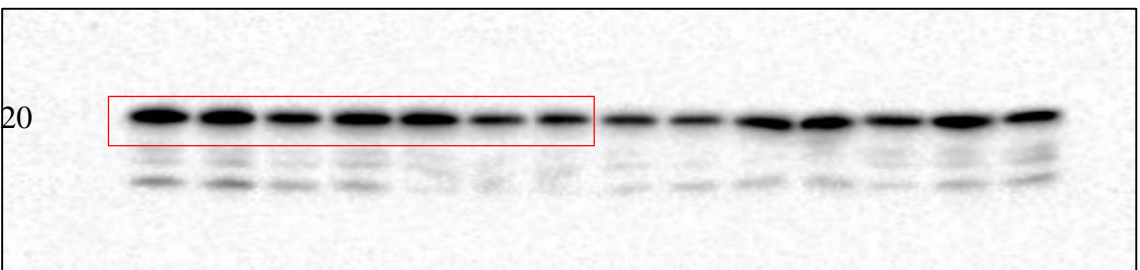

UCP3

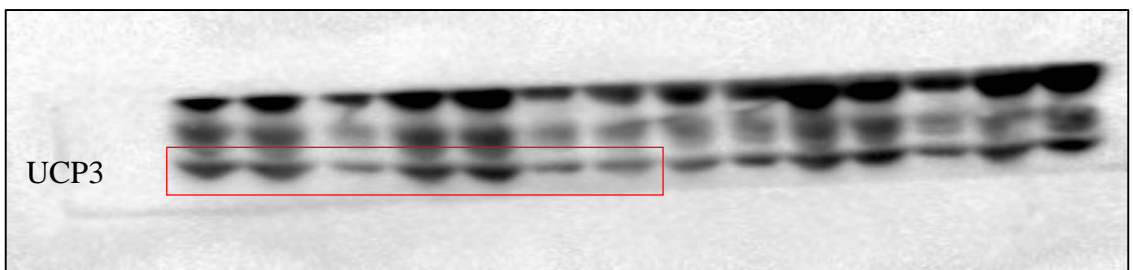

Cox2

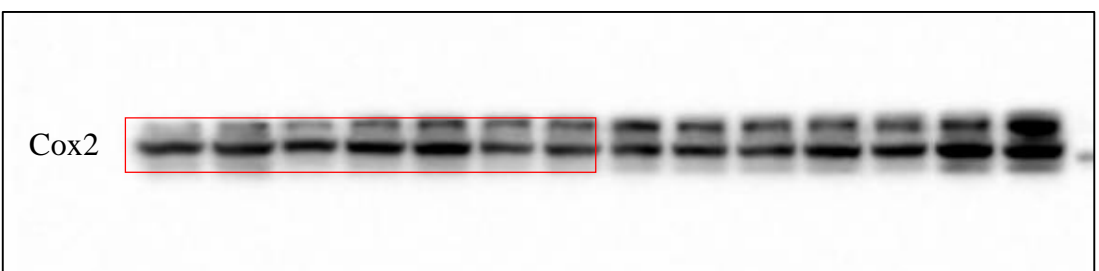

$\beta$ -actin

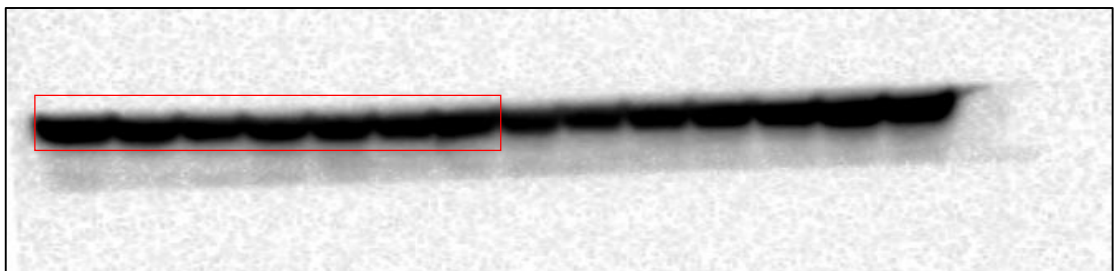

Supplement: JCSM-10-429-s001.pdf [file JCSM-10-429-s001.pdf]
