# Supplementary material for: Myricanol rescues dexamethasone‐induced muscle dysfunction via a sirtuin 1‐dependent mechanism
Source: PubMed Central journal article supplement — J Cachexia Sarcopenia Muscle. 2019 Feb 21;10(2):429–44. doi: 10.1002/jcsm.12393 (PMC6463464; doi:10.1002/jcsm.12393), 2019-02-21
Supplement: JCSM-10-429-s002.pdf [file JCSM-10-429-s002.pdf]

**Myricanol rescues dexamethasone-induced muscle dysfunction via a  
SIRT1 dependent mechanism**

Shengnan Shen<sup>1</sup>, Qiwen Liao<sup>1</sup>, Jingxin Liu<sup>1</sup>, Ruile Pan<sup>2</sup>, Simon Ming Yuen Lee<sup>1</sup> &  
Ligen Lin<sup>1,\*</sup>

*<sup>1</sup> State Key Laboratory of Quality Research in Chinese Medicine, Institute of Chinese Medical Sciences, University of Macau, Avenida da Universidade, Taipa, Macau, China;*

*<sup>2</sup> Institute of Medicinal Plant Development, Peking Union Medical College, Chinese Academy of Medical Science, Beijing 100193, China*

\*Correspondence to: Ligen Lin, State Key Laboratory of Quality Research in Chinese Medicine, Institute of Chinese Medical Sciences, University of Macau, Avenida da Universidade, Taipa, Macao, China. Phone: +853 88228041, Fax : +853 28841358; email: ligenl@umac.mo.

**Table S1 Antibodies for immunoblotting.**

| Antibody                   | Source | Vendor                    | Catalog No. |
|----------------------------|--------|---------------------------|-------------|
| Fbx32(atrogin-1)           | Mouse  | Abcam                     | ab74023     |
| MuRF1                      | Mouse  | Santa Cruz Biotechnology  | sc-398608   |
| SIRT1                      | Rabbit | Santa Cruz Biotechnology  | sc-15404    |
| p-AMPK $\alpha$ (Thr172)   | Rabbit | Santa Cruz Biotechnology  | sc-33524    |
| AMPK $\alpha$ 1/2          | Rabbit | Santa Cruz Biotechnology  | sc-25792    |
| p-Akt1/2/3 (Ser 473)       | Rabbit | Santa Cruz Biotechnolog   | sc-7985     |
| Akt1/2/3                   | Rabbit | Santa Cruz Biotechnolog   | sc-8312     |
| p-FoxO3a (Ser253)          | Rabbit | Cell Signaling Technology | #9466       |
| FoxO3a                     | Rabbit | Cell Signaling Technology | #2497       |
| Tom20                      | Mouse  | Santa Cruz Biotechnology  | sc-17764    |
| PGC-1 $\alpha$             | Rabbit | Cell Signaling Technology | #2187       |
| Cox2                       | Rabbit | Cell Signaling Technology | #12282      |
| UCP3                       | Goat   | Santa Cruz Biotechnology  | sc-31387    |
| Bax                        | Rabbit | Santa Cruz Biotechnology  | sc-525      |
| Bcl-2                      | Mouse  | Santa Cruz Biotechnology  | sc-7382     |
| cleaved caspase-3 (Asp175) | Rabbit | Cell Signaling Technology | #9661       |
| LC3A/B                     | Rabbit | Cell Signaling Technology | #4108       |
| Beclin1                    | Rabbit | Santa Cruz Biotechnology  | sc-11427    |
| p62                        | Rabbit | Cell Signaling Technology | #23214      |
| GAPDH                      | Rabbit | Santa Cruz Biotechnology  | sc-25778    |
| $\beta$ -actin             | Rabbit | Santa Cruz Biotechnology  | sc-1616     |
| MyHC                       | Mouse  | R&D Systems               | MAB4470     |

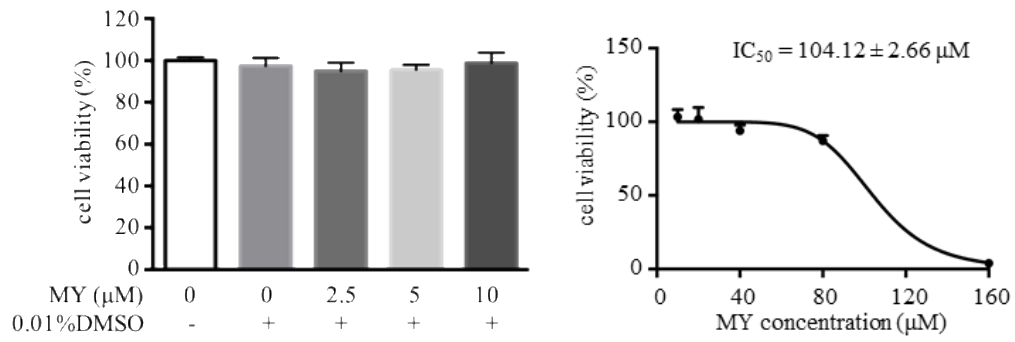

**Figure S1** Cytotoxicity of MY on C2C12 myotubes. Data are shown as mean  $\pm$  S.D.,

$n = 6$ .

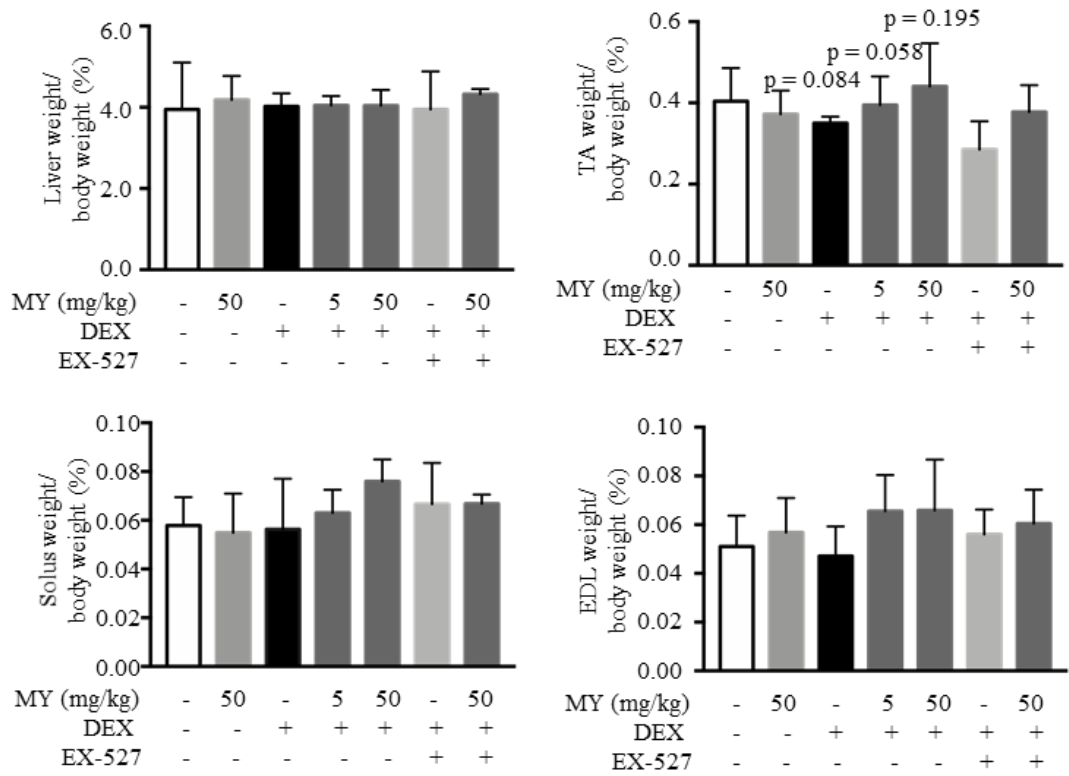

**Figure S2** The ratios of liver, TA, EDL and soleus muscle to body weight. Data are shown as mean  $\pm$  S.D.,  $n = 6$ .

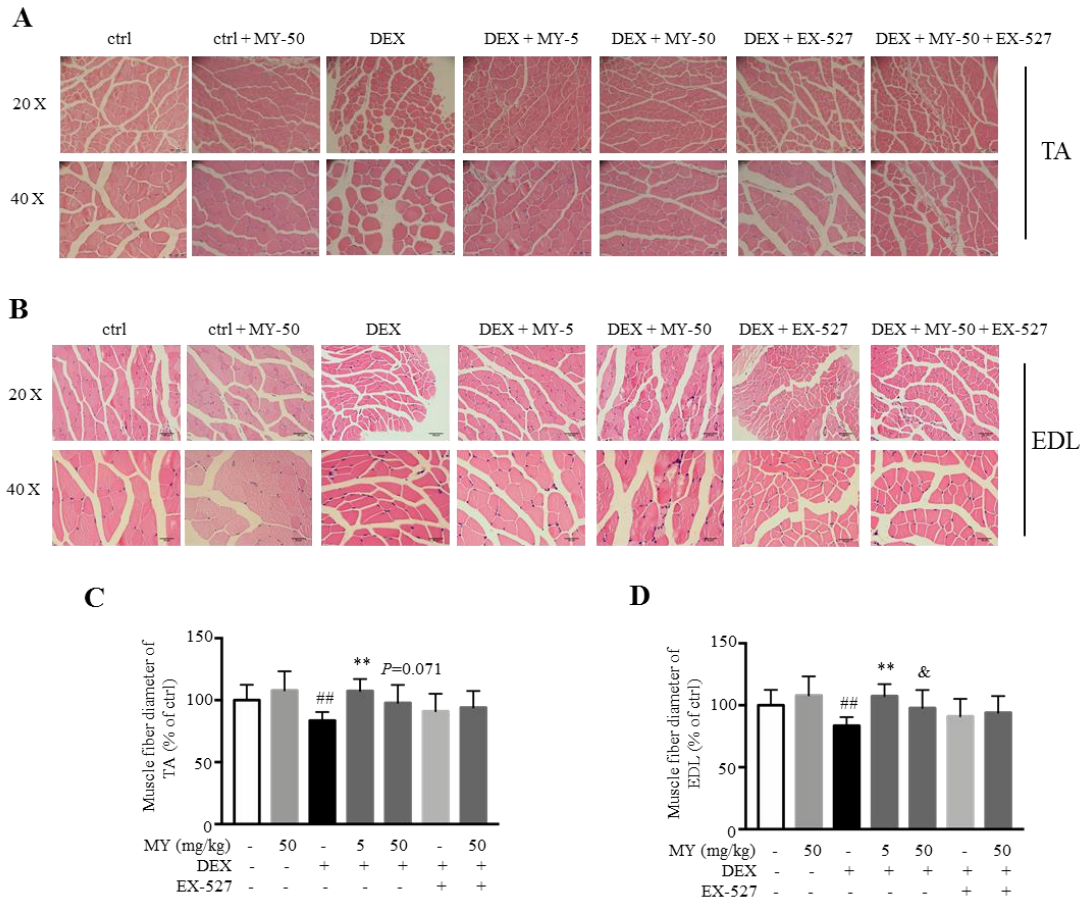

**Figure S3** Representative H&E staining of myofiber cross section of TA (A) and EDL (B). Scale bar = 100 or 50  $\mu$ m on top and bottom, respectively. A microscope with a 10 $\times$  or 20 $\times$  objective was used to capture the images. The cross-sectional diameter of TA (C) and EDL (D) muscle fiber. Ctrl: PEG 400 solution; ctrl + MY-50: PEG 400 solution with 50 mg/Kg MY; DEX: PEG 400 solution with 25 mg/Kg dexamethasone; DEX + MY-5: DEX solution with 5 mg/Kg MY; DEX + MY-50: DEX solution with 50 mg/Kg MY; DEX + EX-527: DEX solution with 10 mg/Kg EX-527; DEX + MY-50 + EX-527: DEX solution with 50 mg/Kg MY and 10 mg/Kg EX-527. Data are shown as mean  $\pm$  S.D.,  $n = 6$ . \*\*  $P < 0.01$ , DEX + MY-5 vs. DEX. &  $P < 0.05$ , DEX + MY-50 vs. DEX. ##  $P < 0.01$ , control vs. DEX.

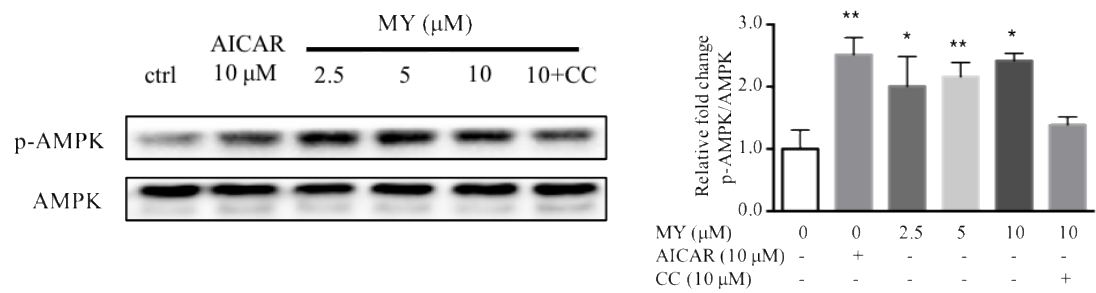

**Figure S4** MY increased AMPK phosphorylation in C2C12 myotubes, and Compound C (CC, the AMPK inhibitor, 10 μM) almost abolished the effect of MY. AICAR (the AMPK activator) was used as a positive control. Data are shown as mean  $\pm$  S.D.,  $n = 6$ . \*  $P < 0.05$ , \*\*  $P < 0.01$ , MY or AICAR vs. ctrl.

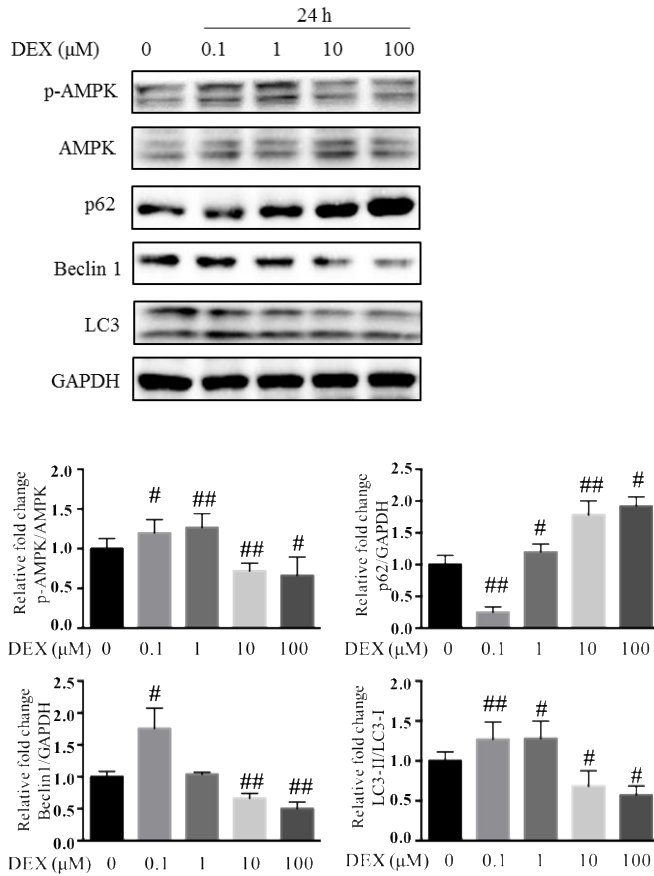

**Figure S5** The expression of p-AMPK, AMPK, p62, Beclin1, LC3 in C2C12 myotubes treated with different concentrations of DEX for 24 hours. GAPDH was used as a loading control. Data are shown as mean  $\pm$  S.D.,  $n = 6$ . #  $P < 0.05$ , ##  $P < 0.01$ , ctrl vs. DEX.
